# Supplementary material for: BAP1 Loss Promotes Suppressive Tumor Immune Microenvironment via Upregulation of PROS1 in Class 2 Uveal Melanomas
Source: MDPI journal article supplement (doi:10.3390/cancers14153678), 2022-07-28
Supplement: s1 [file s1]

**Table S1.** Primary UM samples demographic data.

|        | Age | Gender | Survival Status |
|--------|-----|--------|-----------------|
| UMM063 | 66  | M      | Alive           |
| UMM065 | 44  | F      | Alive           |
| UMM069 | 80  | F      | Expired         |
| UMM079 | 81  | F      | Alive           |

**A**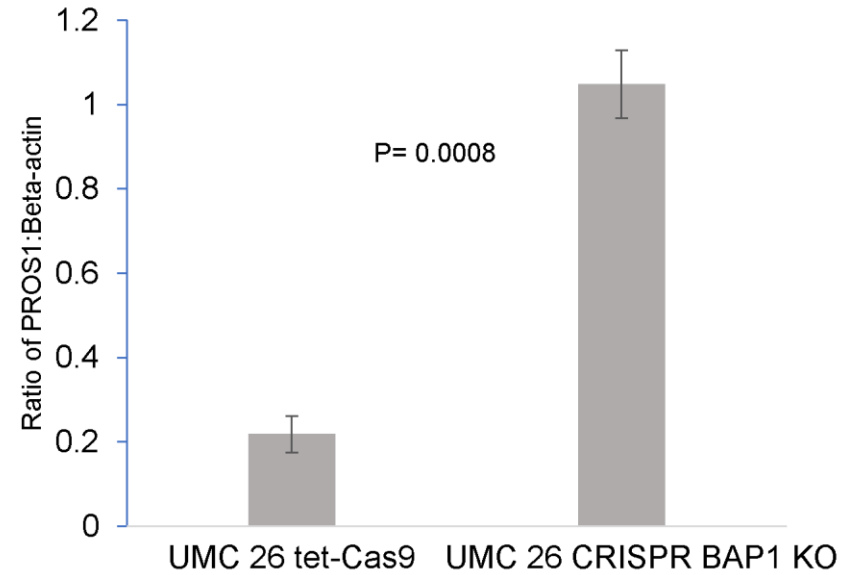**B**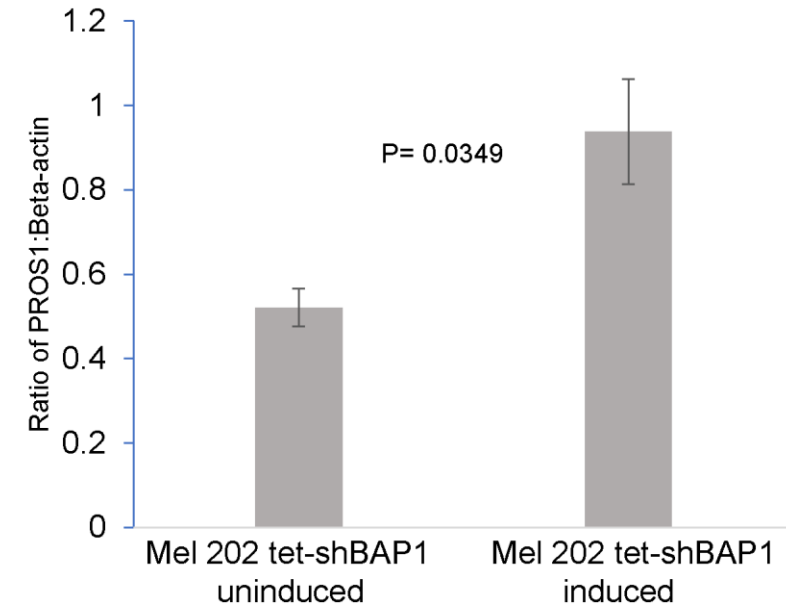

**Figure S1. (A)** Western blots of lysates from UMC026 tet-Cas9 and UMC026 CRISPR BAP1-KO cells reveal increase of PROS1 protein following BAP1 KO by densitometric quantitation of multiple blots (n=3). **(B)** Western blots of lysates from Mel202 tet-shBAP1 uninduced and Mel202 tet-shBAP1 uninduced reveal increase of PROS1 protein following BAP1 knockdown by densitometric quantitation of multiple blots (n=3). Error bars=SEM.

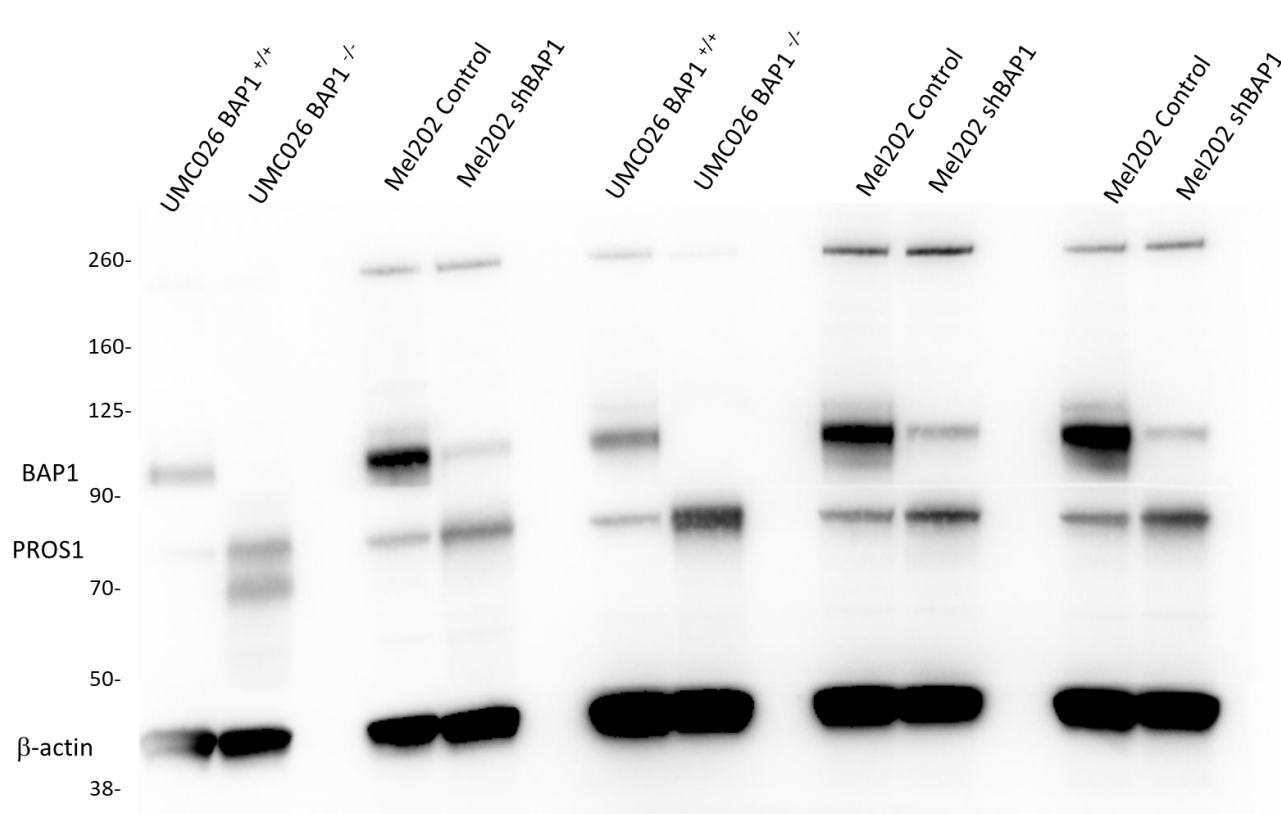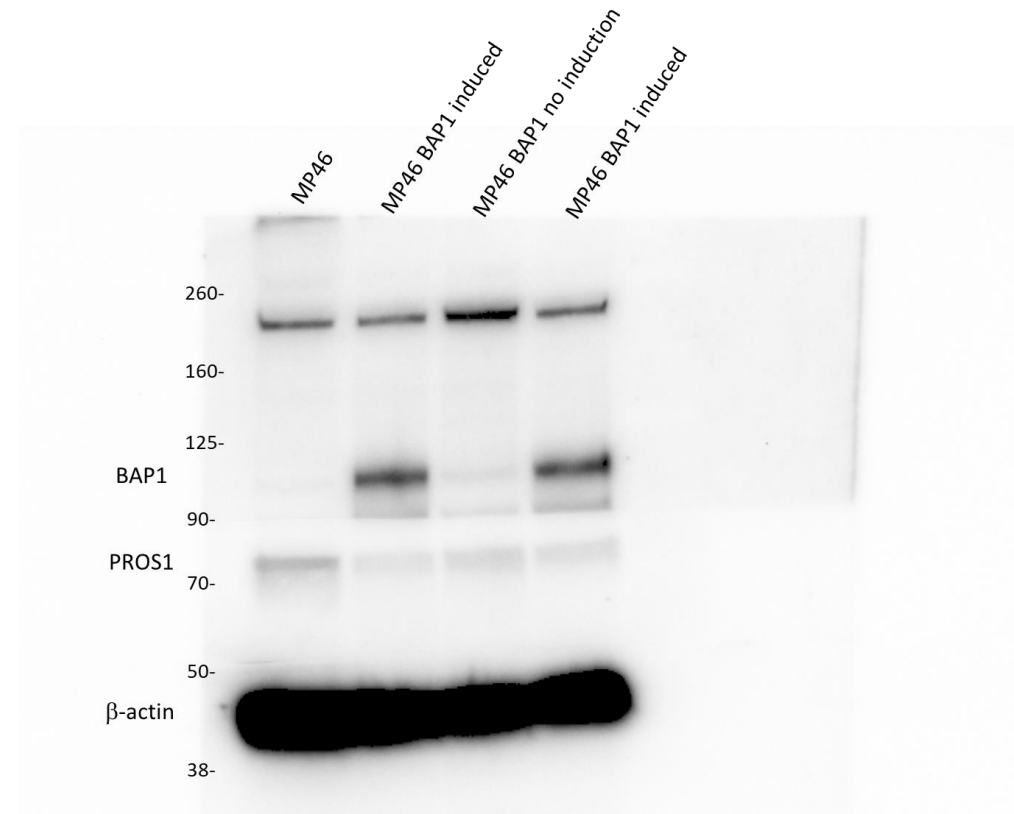

**Figure S2.** Full Western blot images for Figure 1



Class 1 Uveal Melanoma

BAP1: Yellow

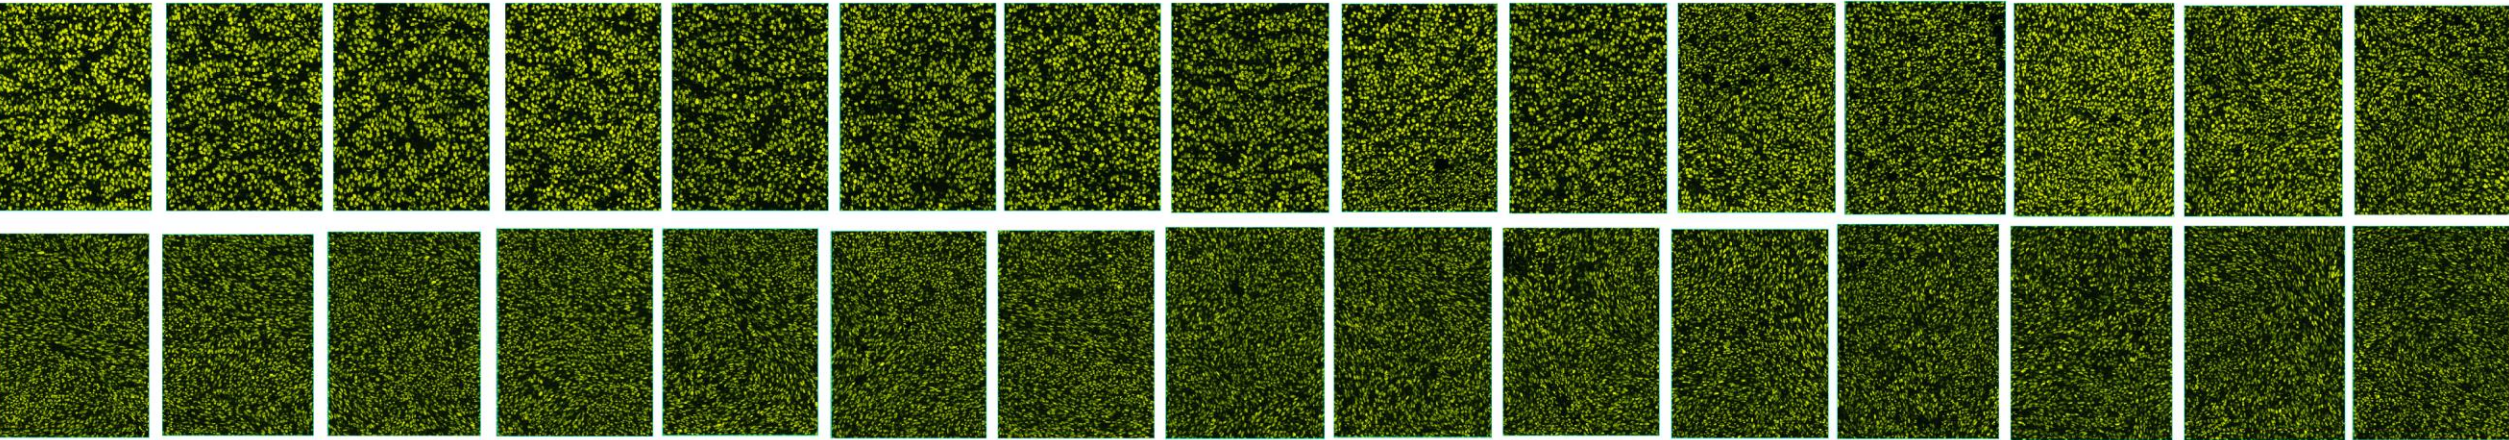

Class 2 Uveal Melanoma

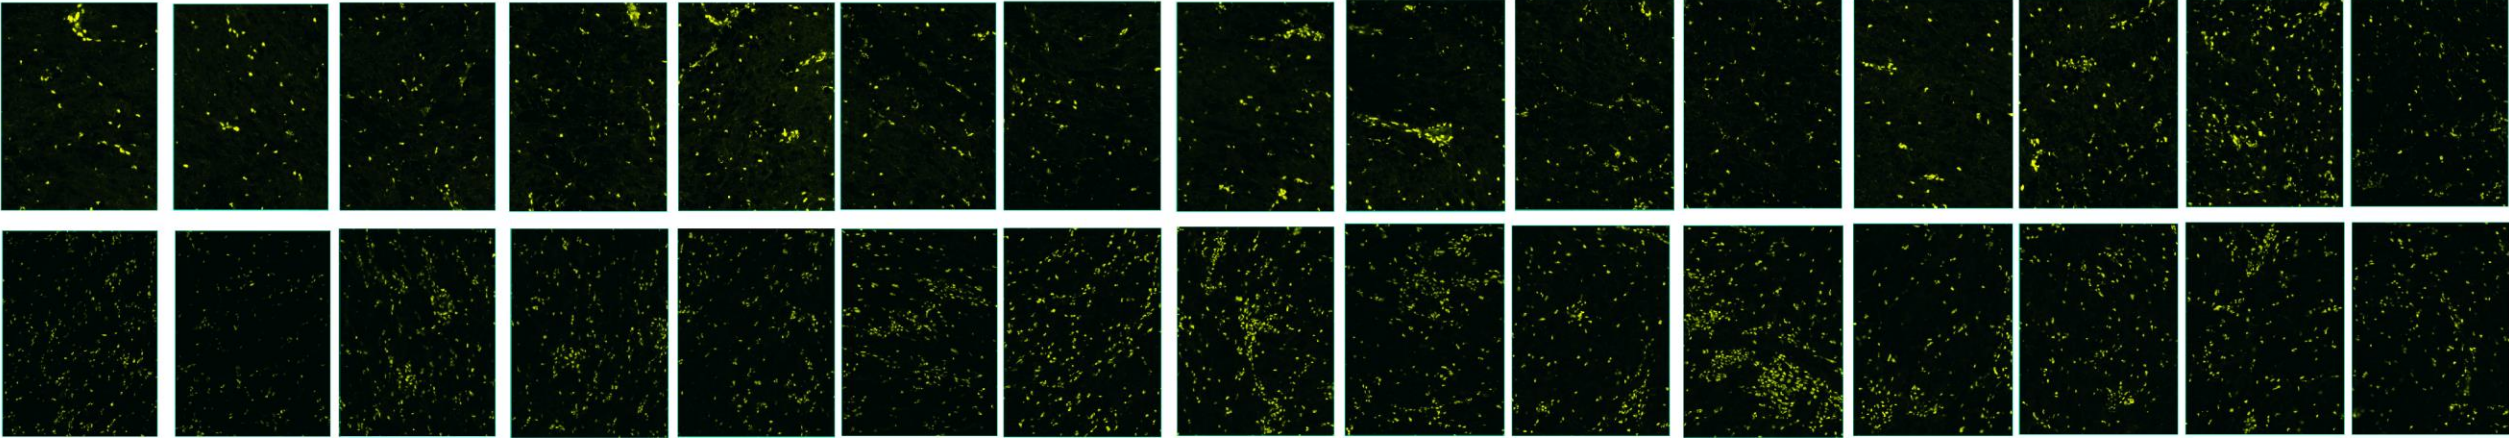

**Figure S3.** Immunohistochemistry for BAP1 from 60 regions from class 1 (UMM65, UMM79) and class 2 (UMM63, UMM69) uveal melanomas.



Class 2 Uveal Melanoma

PROS1: Grey

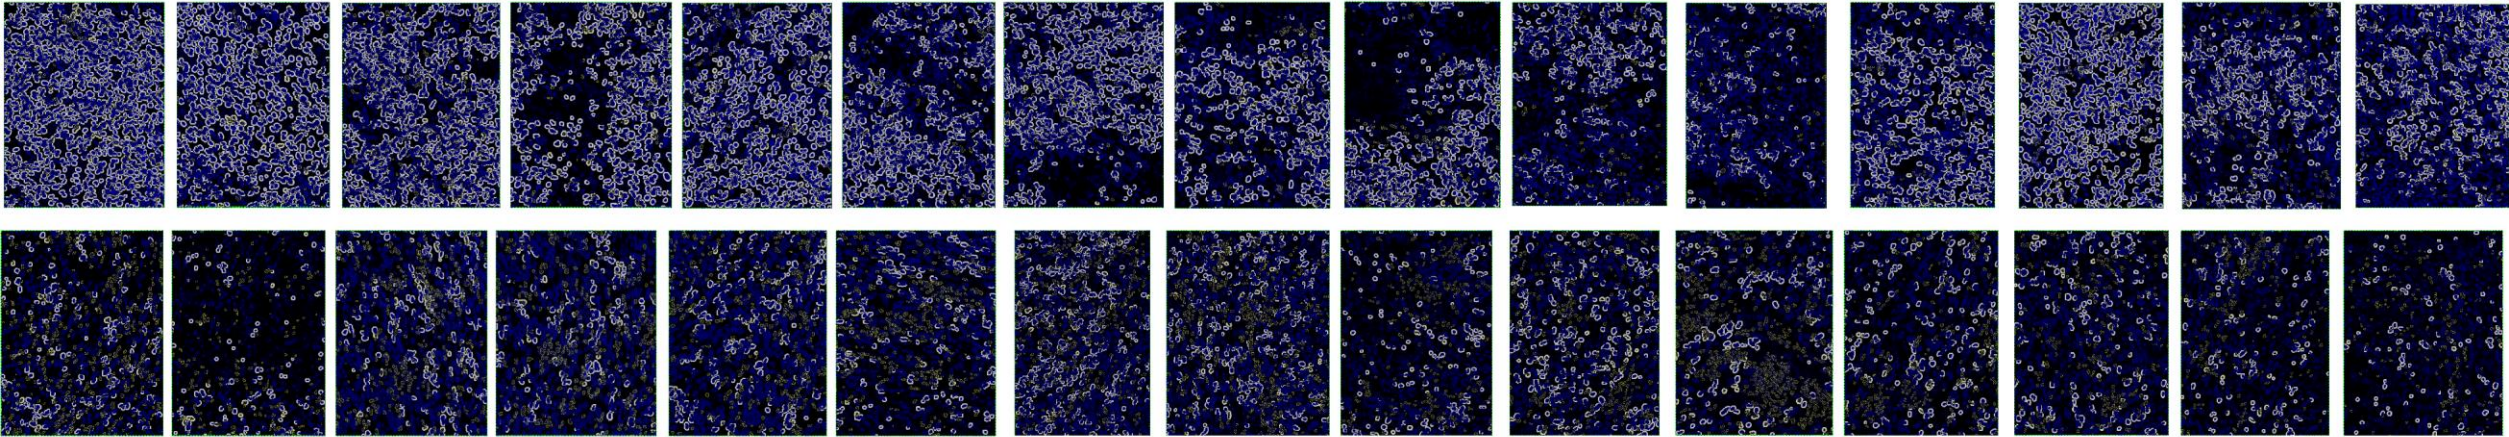

Class 1 Uveal Melanoma

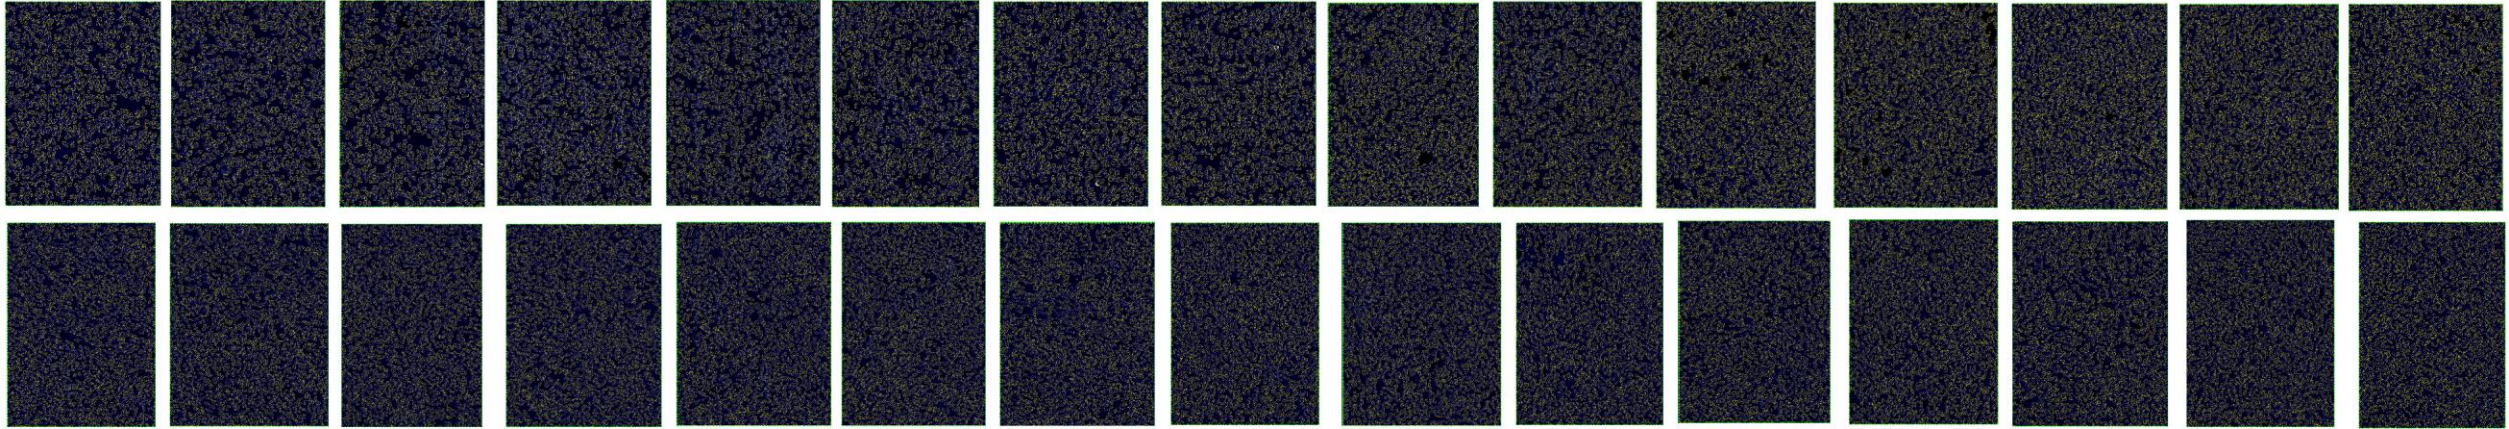

**Figure S4.** Immunohistochemistry for PROS1 from 60 regions from class 1 (UMM65, UMM79) and class 2 (UMM63, UMM69) uveal melanomas.



Class 2 Uveal Melanoma

Phospho-MerTK: Green

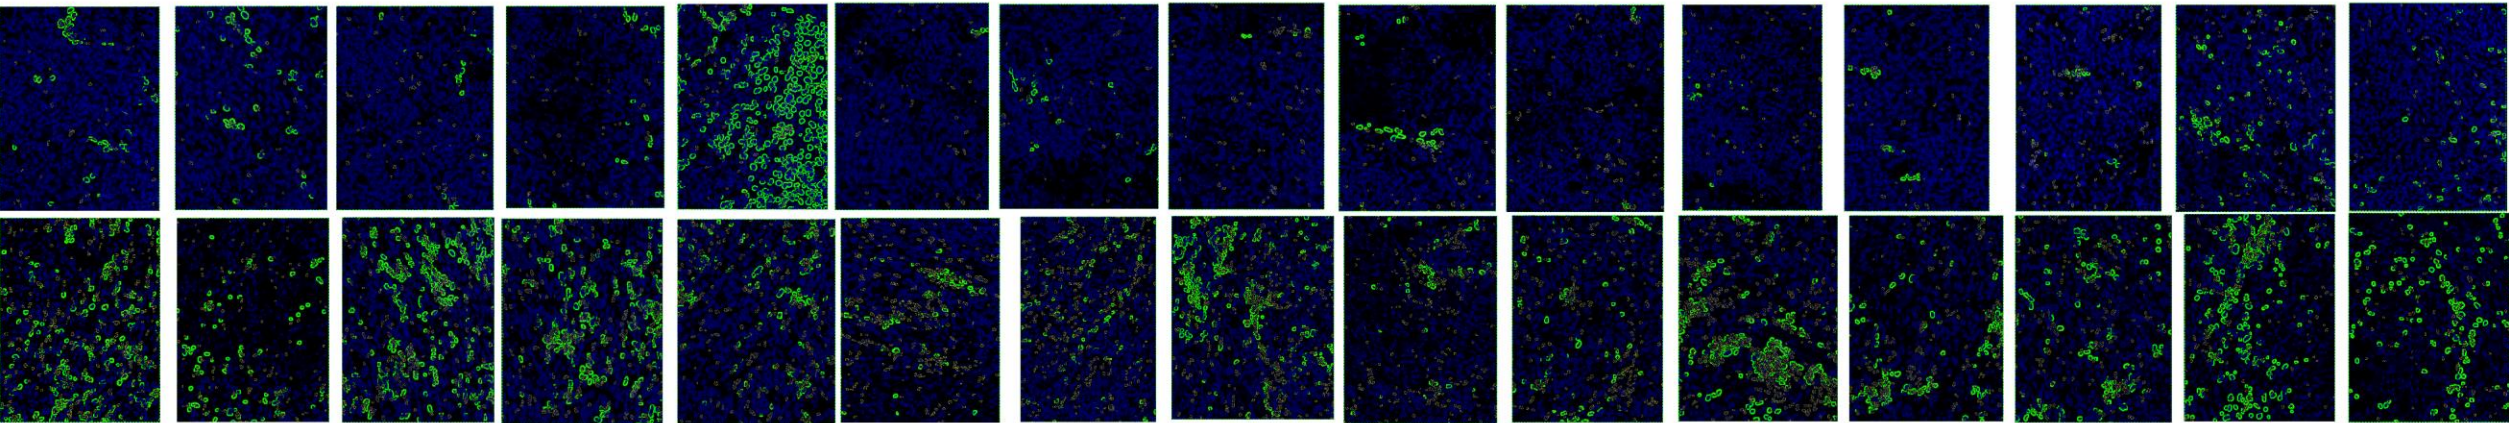

Class 1 Uveal Melanoma

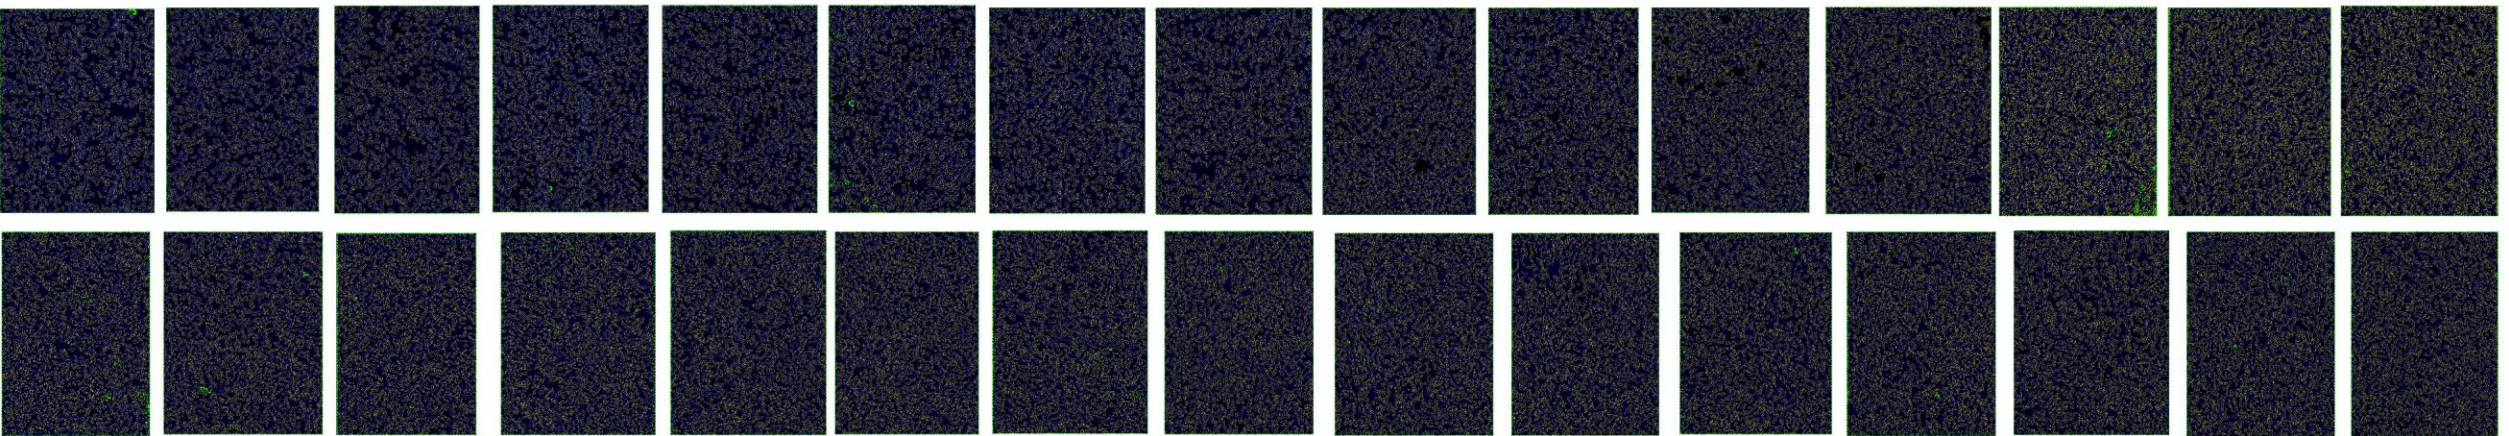

**Figure S5.** Immunohistochemistry for phospho-MERTK regions from class 1 (UMM65, UMM79) and class 2 (UMM63, UMM69) uveal melanomas.



Class 2 Uveal Melanoma

CD163: Red

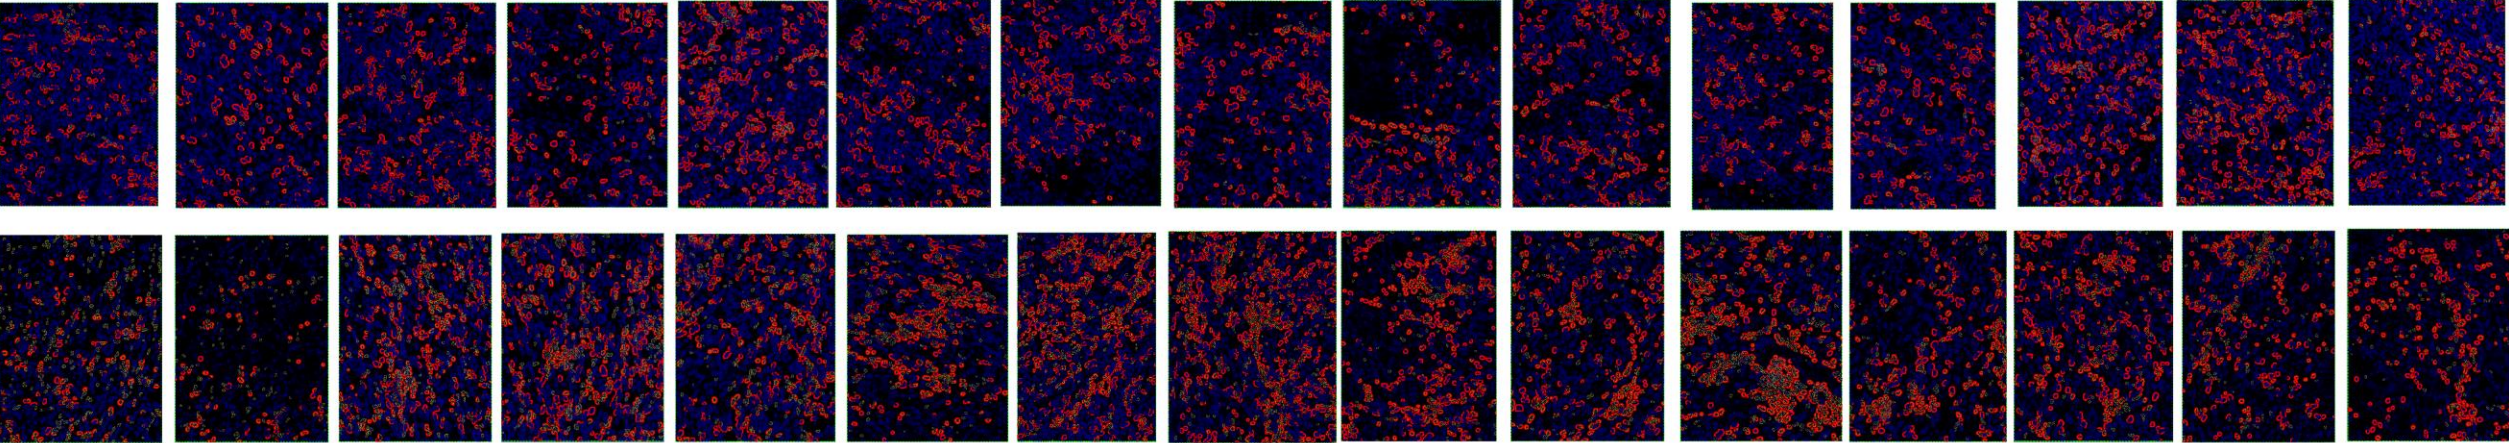

Class 1 Uveal Melanoma

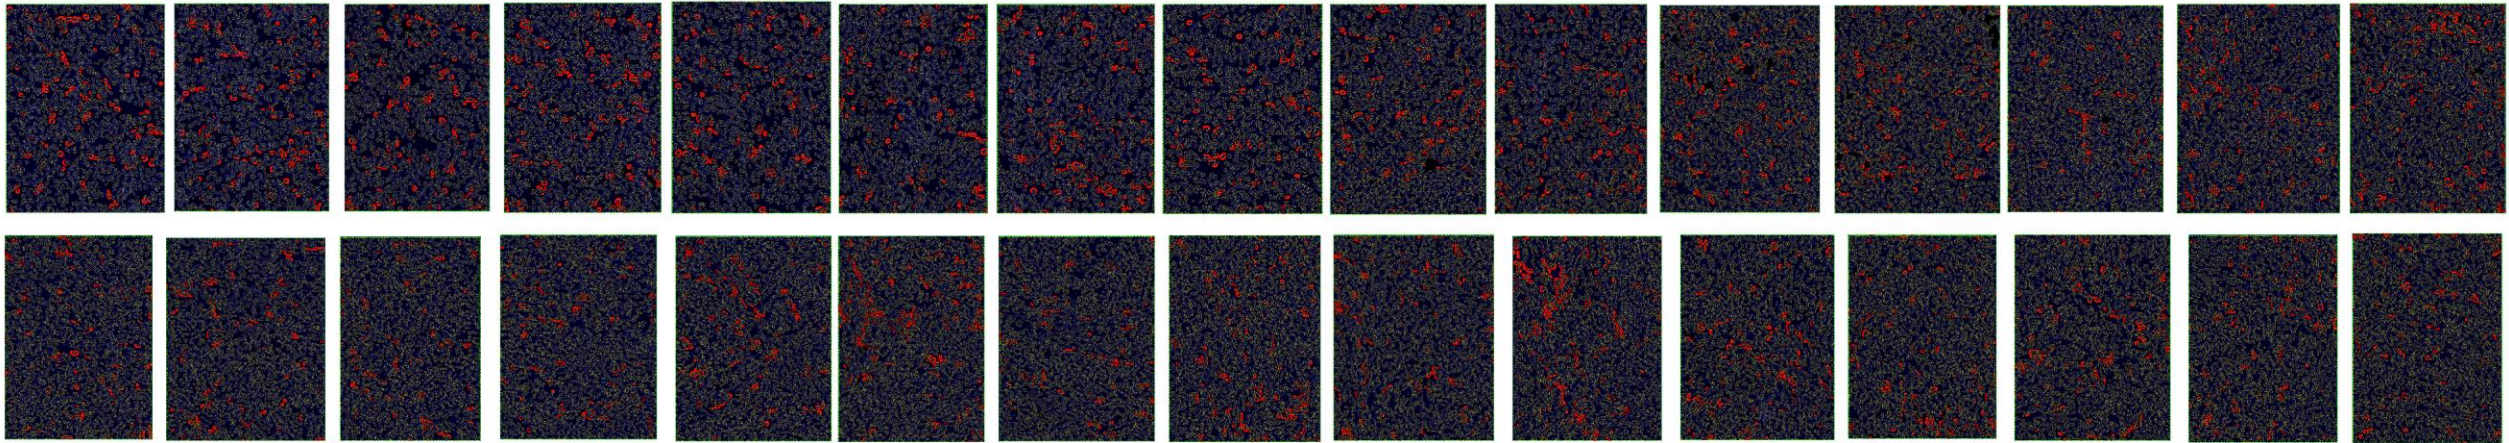

**Figure S6.** Immunohistochemistry for CD 163 from 60 regions from class 1 (UMM65, UMM79) and class 2 (UMM63, UMM69) uveal melanomas.



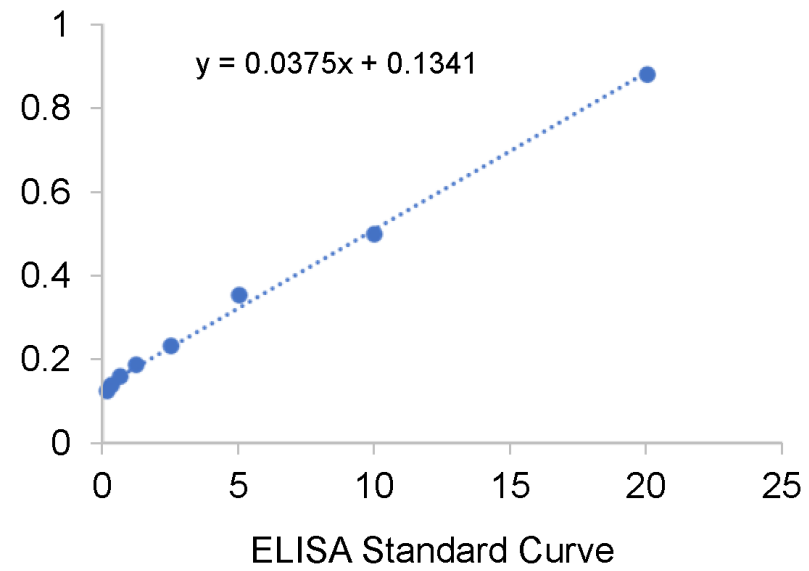

**Figure S7.** ELISA standard curve documenting linearity of analyte concentration.



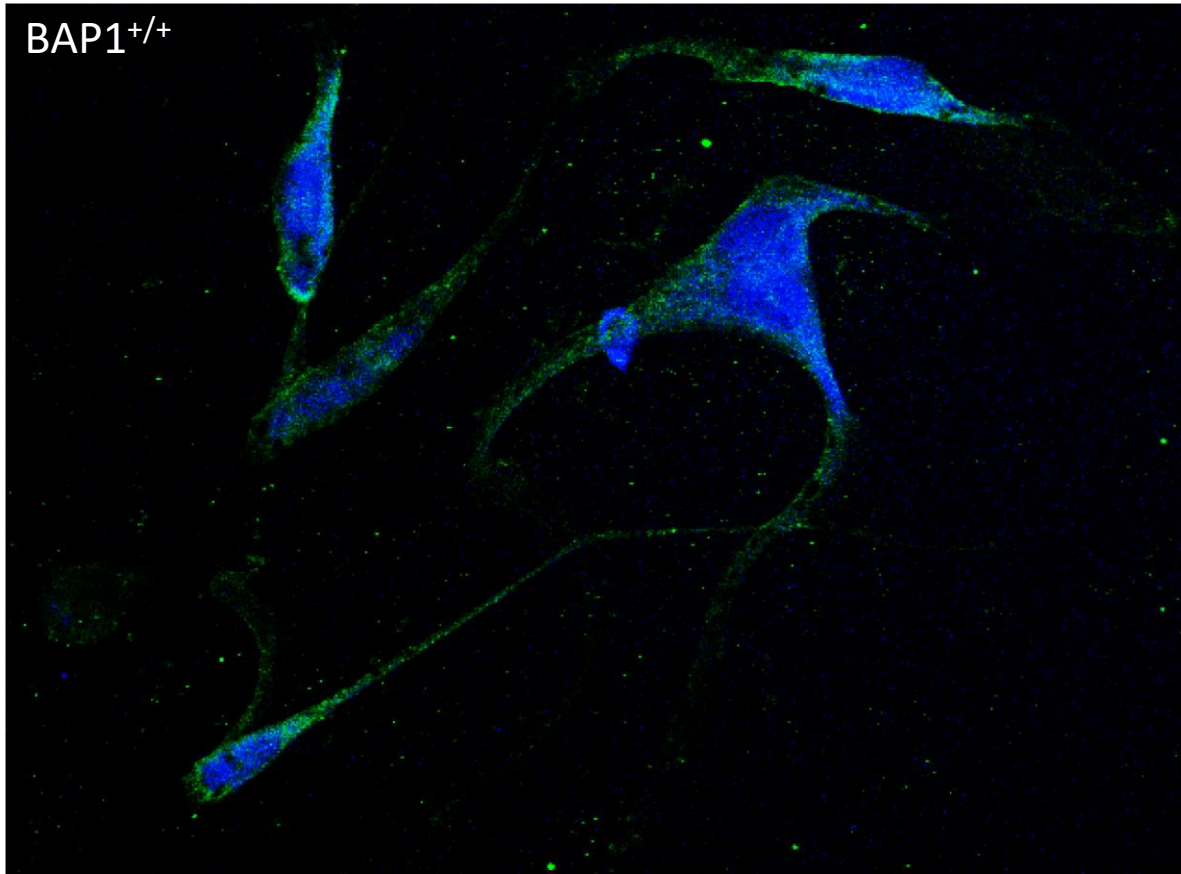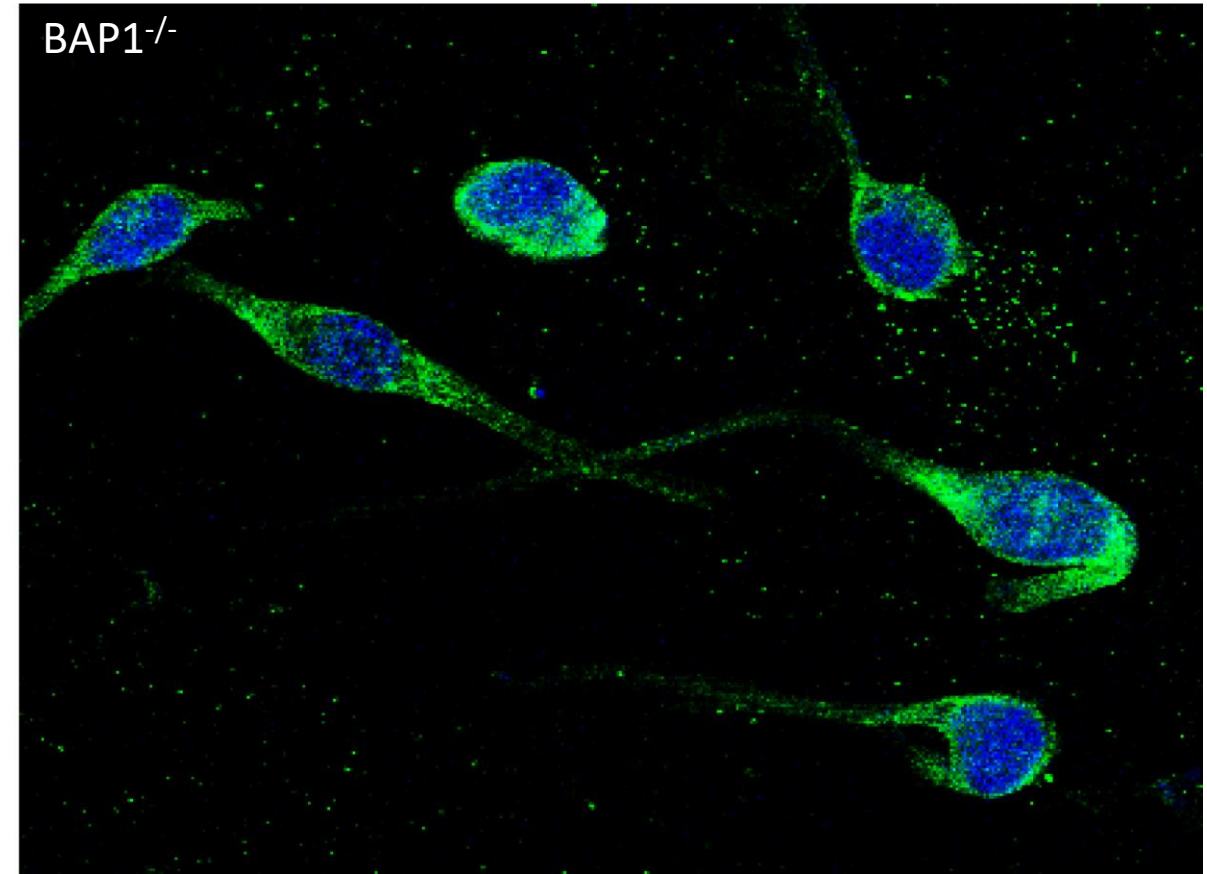

**Figure S8.** Confocal microscopy images of UMC026 cells with or without BAP1 knockout immunostained for PROS1 (green). Blue= DAPI nuclear stain.



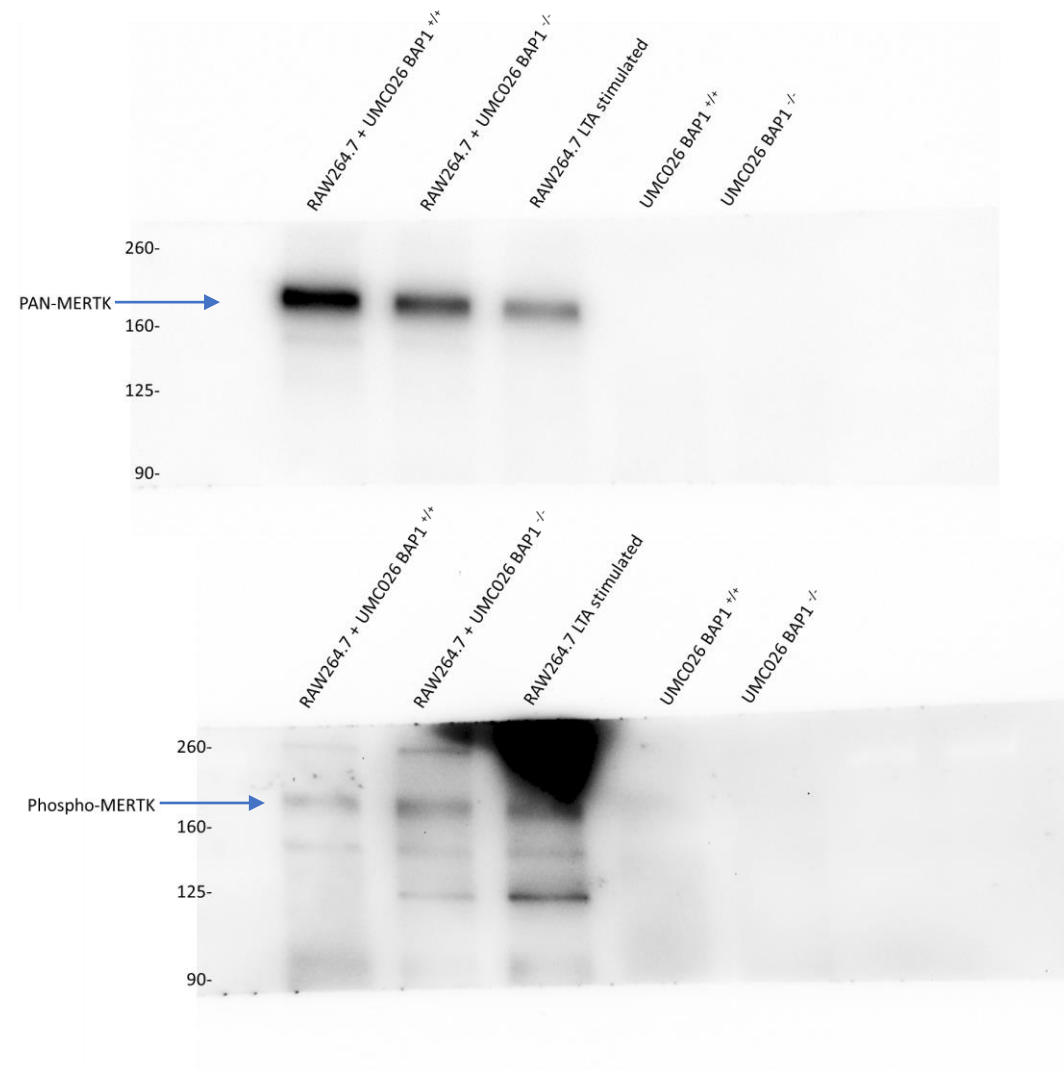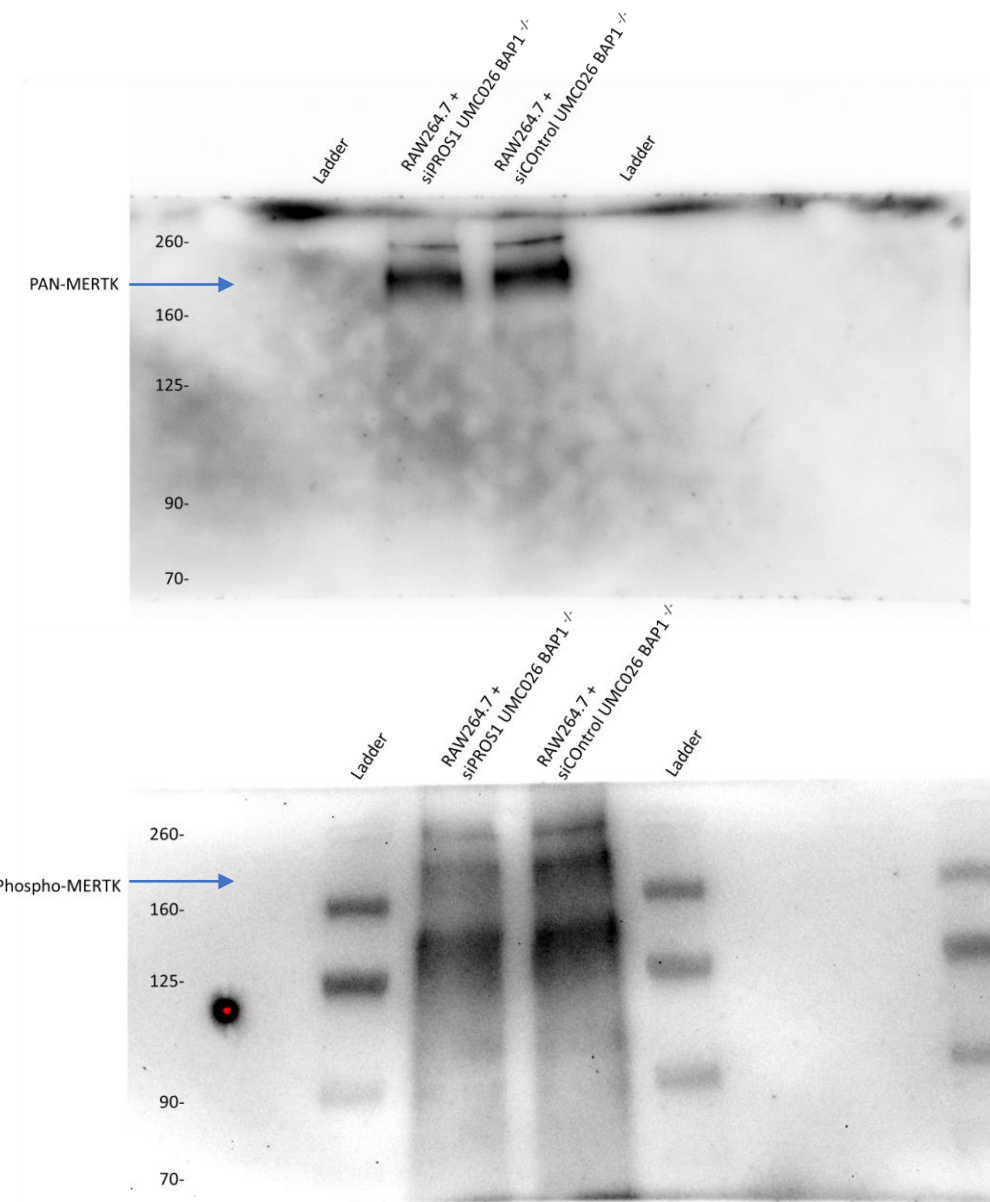

**Figure S9.** Full Western blot images for Figure 4.



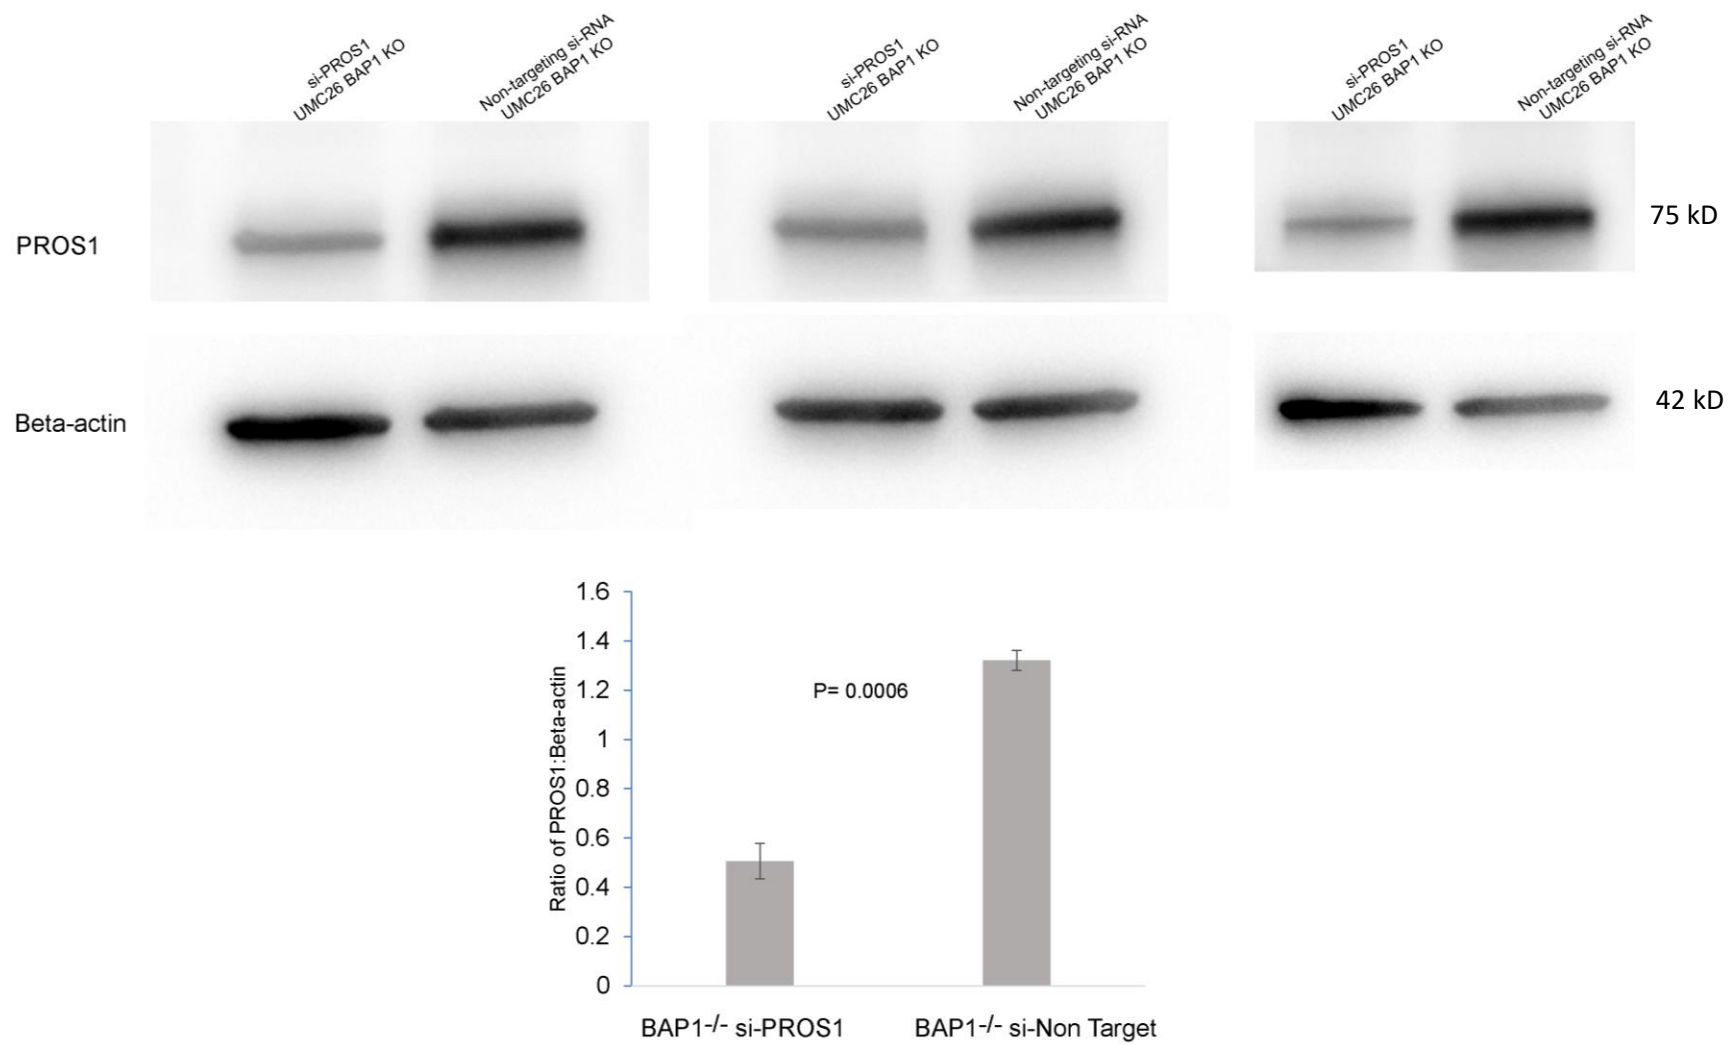

**Figure S10.** Confirmation of PROS1 knockdown in UMC026 BAP1-negative cells used in RAW cell co-culture functional assays. Western blots of lysates from the UMC026 BAP1-KO cells used in co-culture experiments (**Figure 4E, F**) indicate siRNA knockdown of PROS1 in a range of 52-75% by densitometric quantitation of multiple blots (n=3). Error bars=SEM.



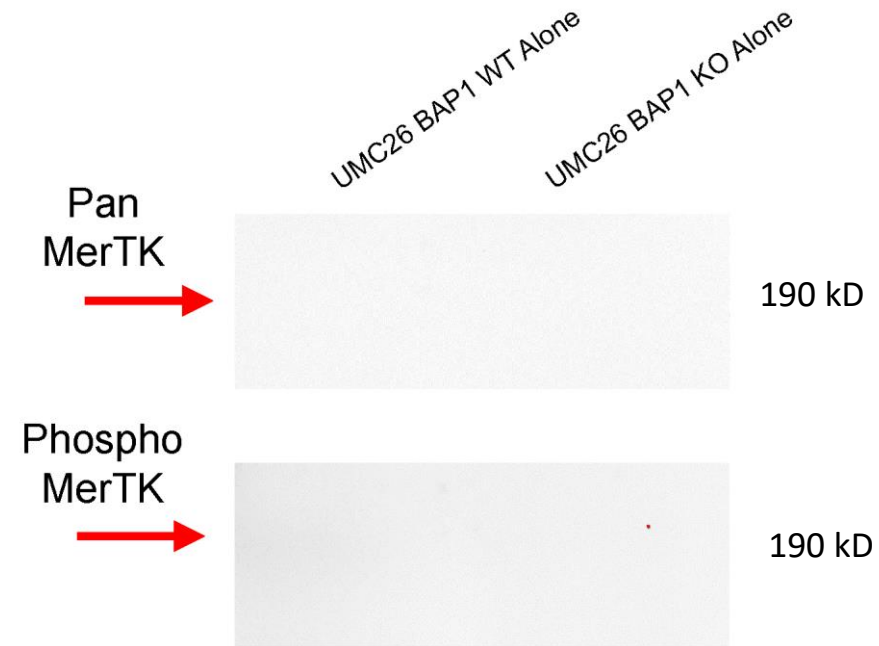

**Figure S11.** Immunoprecipitated MERTK expression is undetected when the melanocyte cell lines are cultured independently of RAW 264.7 cells.
